# Supplementary material for: Clinical Predictors of Lung Function in Patients Recovering from Mild COVID-19
Source: Research Square preprint supplement (doi:10.21203/rs.3.rs-1124510/v1), 2021-12-10
Supplement: Supplementary file 1 [file 97b788f688cb62d38efca031.docx]

**ONLINE SUPPLEMENT**

**Clinical predictors of lung function in patients recovering from mild COVID-19**

Arturo Cortes-Telles1* ORCID: **0000-0002-5322-5604**

Esperanza Figueroa-Hurtado1 ORCID: **0000-0003-1388-0572**

Diana Lizbeth Ortiz-Farias1 ORCID: **0000-0002-3212-1929**

Gerald Stanley Zavorsky2* ORCID: **0000-0002-4473-1601**

1 Respiratory and Thoracic Surgery Unit. Hospital Regional de Alta Especialidad de la Peninsula de Yucatan. Yucatan, Mexico.

2Pulmonary Services & Blood-Gas Laboratories. UC Davis Medical Center. Sacramento, California, USA.

**Table S1.** Studies demonstrating impaired DLCO one to 180 days post- COVID-19 diagnosis.

| Study | # f patients | Age (years) | BMI | Number of days post-COVID-19 | Main findings |
| --- | --- | --- | --- | --- | --- |
| DLCO below the LLN |  |  |  |  |  |
| Present Study | 146 | 50 (14) | 30 (5) | 34 (4) days | 30% with mild COVID-19 presented with DLCO values below the LLN |
| Abdallah *et al.* (2021)1 | 63 | 49 (13) | 29 (8) | 120 (16) days | 71% of patients hospitalized for COVID-19 had a DLCO < LLN. However, 32% of the non-hospitalized COVID-19 patients had a DLCO < LLN |
| Van der Sar et al. (2021)2 | 101 | 66 (13) | 27 | 42 days | 63% of patients hospitalized with severe pneumonia has a DLCO < LLN. However, 52% those with moderate pneumonia had a DLCO < LLN |
| Morin *et al.* (2021)3 | 152 | 61 (16) | 29 (6) | 120 days | 22% in total were below the LLN for DLCO. 16% of non-intubated patients were below the LLN, vs 36% of patients intubated |
| Cortés-Telles *et al.* (2021)4 | 186 | 47 (13) | 32 (7) | 59 (13) days | 19% with mild/moderate COVID-19 illness were below the LLN for DLCO, compared to 54% for those with severe/critical COVID-19 illness. |
| Goachicoa-Rangel *et al.* (2021)5 | 171 | 46 (12) | 29 (5) | 84 (20) days | 17% of those without invasive ventilation and 41% with invasive ventilation presented with DLCO values below the LLN |
| Nunez-Fernandez *et al.* (2021)6 | 200 | 62 | 29 | 120 days | 17% presented with DLCO values below the LLN |
| Ekbom *et al.* (2021)7 | 60 | N/A | ⁓30 | 120 days | 45% presented with DLCO values below the LLN |
| Ven den Borst *et al.* (2021)8 | 124 | 59 (14) | 28 (5) | 90 days | 55%, 33%, and 0% of patients with severe, moderate, and mild disease, respectively were below the LLN for DLCO |
| Barisione & Brusasco (2021)9 | 94 | 61 (12) | 29 (4) | 90 days | 20% presented with DLCO values below the LLN |
| Lerum *et al.* (2020)10 | 102 | 54 (5) | 26 | 90 days | 24% presented with DLCO values below the LLN. 29% were admitted to ICU. 23% were not admitted. |
| DLCO < 80% predicted |  |  |  |  |  |
| Guler *et al.* (2021)11 | 113 | 57 (11) | 28 (11) | 128 days | 13% and 83% of those with mild and severe COVID-19 illness had a DLCO < 80% of predicted. |
| Sonnweber *et al.* (2021)12 | 145 | 57 (14) | 26 (5) | 63 (23) days  103 (21) days | 31% and 21% were presented with a DLCO < 80% predicted at 63 days and 103 days post-COVID-19, respectively. |
| Han *et al.* (2021)13 | 114 | 54 (12) | N/A | 180 days | 26% of all patients presented with a DLCO of < 80% predicted. 50% of patients with fibrotic-like changes on CT presented with a DLCO < 80% of predicted vs 13% of patients without fibrotic-like changes on CT |
| Bellan *et al.* (2021)14 | 219 | 61 | N/A | 120 days | 52% of patients with COVID-19 presented with DLCO values < 80% predicted |
| Qin *et al.* (2021)15 | 81 | 59 (14) | 24 (3) | 90 days | 42% and 68% of those with non-severe and severe COVID-19, respectively had a DLCO < 80% pred. |
| Blanco *et al.* (2021)16 | 108 | 55 (11) | N/A | 104 days | 52% with DLCO values below 80% predicted |
| Shah et al. (2020)17 | 60 | 67 | 25 | 82 days | About 50% of subjects were below 80% predicted. |
| Mo *et al.* (2020)18 | 110 | 49 (14) | 24 (3) | 20 (6) days  34 (7) days | 30% and 84% of those with mild and severe COVID-19 illness had a DLCO < 80% of predicted. |
| Liang *et al.* (2020)19 | 76 | 41 (14) | 24 (5) | 30 days | 20% of patients presented with a DLCO of < 80% predicted |
| Huang et al. (2020)20 | 57 | 47 (14) | 24 (4) | 30 days | 77% and 43% of those with severe and non-severe COVID-19 illness had a DLCO < 80% of predicted. |
| Liu et al. (2020)21 | 36 | 69 (8) | 23 (4) | N/A | About 85% had DLCO values below 80% predicted |
| Zhao *et al.* (2020)22 | 55 | 48 (16) | 25 (3) | 90 days | 24% presented with DLCO values below the LLN |

**Table S2.** Results from the medical assessment and detailed medical history obtained 34 (SD 4) days post-COVID-19 diagnosis.

|  | DLCO < LLN  N = 44 | DLCO ≥ LLN  N = 100 | p-value |
| --- | --- | --- | --- |
| Restrictive spirometric pattern (FVC< LLN and FEV1/FVC ≥ LLN) | 18 (41%) | 13 (13%) | **0.0002** |
| Weight loss | 16 (36%) | 40 (40%) | 0.65 |
| Use of oral corticosteroids | 9 (20%) | 14 (14%) | 0.37 |
| Use of anticoagulants | 34 (77%) | 75 (75%) | 0.80 |
| Cardiac disease | 3 (7%) | 1 (1%) | 0.046 |
| Tachycardia | 1 (2%) | 6 (6%) | 0.30 |
| Symptoms of Cardiovascular Disease |  |  |  |
| Hypertension | 11 (25%) | 17 (17%) | 0.27 |
| Diabetes | 1 (2%) | 4 (4%) | 0.54 |
| Current or former smoker | 7 (16%) | 14 (14%) | 0.76 |
| Obesity (BMI ≥ 30 kg/m2) | 25 (57%) | 44 (44%) | 0.15 |
| Other symptoms post-COVID-19 diagnosis |  |  |  |
| Fatigue | 34 (77%) | 73 (73%) | 0.61 |
| Shortness of breath on effort | 23 (52%) | 38 (38%) | 0.12 |
| Chest tightness | 15 (34%) | 37 (37%) | 0.73 |
| Sore throat | 13 (30%) | 26 (26%) | 0.62 |
| Headache | 6 (14%) | 14 (14%) | 1.00 |
| Loss of smell | 6 (14%) | 22 (22%) | 0.27 |
| Loss of taste | 4 (9%) | 18 (18%) | 0.17 |
| Abdominal pain | 1 (2%) | 5 (5%) | 0.40 |
| Muscle or joint pain | 6 (14%) | 18 (18%) | 0.56 |
| Visual signs present post-COVID-19 diagnosis |  |  |  |
| Cough | 20 (46%) | 43 (43%) | 0.74 |
| Hair loss | 11 (25%) | 28 (28%) | 0.71 |
| Diarrhea | 4 (9%) | 6 (6%) | 0.52 |
| Blocked nose and/or runny nose | 9 (21%) | 44 (44%) | 0.0087 |
| Excessive sweating | 5 (11%) | 25 (25%) | 0.057 |
| Sore or red eyes | 4 (9%) | 4 (4%) | 0.23 |

Patients were asked to recount presence or absence of symptoms at time of visit. The N-1 Chi-Squared Test was used to compare proportions between those with a DLCO < LLN and those with a DLCO ≥ LLN.23 A Benjamini-Hochberg procedure was used to control the false discovery rate,24 which we set to 0.05. As such, the only comparison that was significantly different between the two groups was the proportion of those with spirometric restriction.

**References**

1. Abdallah SJ, Voduc N, Corrales-Medina VF, McGuinty M, Pratt A, Chopra A, et al. Symptoms, Pulmonary Function and Functional Capacity Four Months after COVID-19. *Ann Am Thorac Soc* 2021. Apr 19. doi: 10.1513/AnnalsATS.202012-1489RL. Online ahead of print.

2. van der Sar-van der Brugge S, Talman S, Boonman-de Winter L, de Mol M, Hoefman E, van Etten RW, et al. Pulmonary function and health-related quality of life after COVID-19 pneumonia. *Respir. Med.* 2021; **176**: 106272. doi: 10.1016/j.rmed.2020.106272.

3. Morin L, Savale L, Pham T, Colle R, Figueiredo S, Harrois A, et al. Writing Committee for the Comebac Study Group. Four-Month Clinical Status of a Cohort of Patients After Hospitalization for COVID-19. *JAMA,* 2021; **325**: 1525-34. doi: 10.1001/jama.2021.3331.

4. Cortes-Telles A, Lopez-Romero S, Figueroa-Hurtado E, Pou-Aguilar YN, Wong AW, Milne KM, et al. Pulmonary function and functional capacity in COVID-19 survivors with persistent dyspnoea. *Respir. Physiol. Neurobiol.* 2021; **288**: 103644. doi: 10.1016/j.resp.2021.103644.

5. Gochicoa-Rangel L, Hernandez-Morales AP, Salles-Rojas A, Madrid-Mejia W, Guzman-Valderrabano C, Gonzalez-Molina A, et al. Gas Exchange Impairment During COVID-19 Recovery. *Respir. Care.* 2021; **66**: 1610-7. doi: 10.4187/respcare.09114.

6. Nunez-Fernandez M, Ramos-Hernandez C, Garcia-Rio F, Torres-Duran M, Nodar-Germinas A, Tilve-Gomez A, et al. Alterations in Respiratory Function Test Three Months after Hospitalisation for COVID-19 Pneumonia: Value of Determining Nitric Oxide Diffusion. *J. Clin. Med.* 2021; **10**: 2119. doi: 10.3390/jcm10102119.

7. Ekbom E, Frithiof R, Emilsson O, Larson LM, Lipcsey M, Rubertsson S, et al. Impaired diffusing capacity for carbon monoxide is common in critically ill Covid-19 patients at four months post-discharge. *Respir. Med.* 2021; **182**: 106394. doi: 10.1016/j.rmed.2021.106394.

8. van den Borst B, Peters JB, Brink M, Schoon Y, Bleeker-Rovers CP, Schers H, et al. Comprehensive Health Assessment 3 Months After Recovery From Acute Coronavirus Disease 2019 (COVID-19). *Clin. Infect. Dis.* 2021; **73**: e1089-98. doi: 10.1093/cid/ciaa1750.

9. Barisione G, Brusasco V. Lung diffusing capacity for nitric oxide and carbon monoxide following mild-to-severe COVID-19. *Physiol. Rep.* 2021; **9**: e14748. doi: 10.14814/phy2.14748.

10. Lerum TV, Aalokken TM, Bronstad E, Aarli B, Ikdahl E, Lund KMA, et al. Dyspnoea, lung function and CT findings 3 months after hospital admission for COVID-19. *Eur. Respir. J.* 2021; **57**: 2003448. doi: 10.1183/13993003.03448-2020.

11. Guler SA, Ebner L, Aubry-Beigelman C, Bridevaux PO, Brutsche M, Clarenbach C, et al. Pulmonary function and radiological features 4 months after COVID-19: first results from the national prospective observational Swiss COVID-19 lung study. *Eur. Respir. J.* 2021; **57**: 2003690. doi: 10.1183/13993003.03690-2020.

12. Sonnweber T, Sahanic S, Pizzini A, Luger A, Schwabl C, Sonnweber B, et al. Cardiopulmonary recovery after COVID-19: an observational prospective multicentre trial. *Eur. Respir. J.* 2021; **57**: 2003481. doi: 10.1183/13993003.03481-2020.

13. Han X, Fan Y, Alwalid O, Li N, Jia X, Yuan M, et al. Six-month Follow-up Chest CT Findings after Severe COVID-19 Pneumonia. *Radiology.* 2021; **299**: E177-86. doi: 10.1148/radiol.2021203153.

14. Bellan M, Soddu D, Balbo PE, Baricich A, Zeppegno P, Avanzi GC, et al. Respiratory and Psychophysical Sequelae Among Patients With COVID-19 Four Months After Hospital Discharge. *JAMA. Netw. Open.* 2021; **4**: e2036142. doi: 10.1001/jamanetworkopen.2020.36142.

15. Qin W, Chen S, Zhang Y, Dong F, Zhang Z, Hu B, et al. Diffusion capacity abnormalities for carbon monoxide in patients with COVID-19 at 3-month follow-up. *Eur. Respir. J.* 2021; **58**: 2003677. doi: 10.1183/13993003.03677-2020.

16. Blanco JR, Cobos-Ceballos MJ, Navarro F, Sanjoaquin I, Arnaiz de Las Revillas F, Bernal E, et al. Pulmonary long-term consequences of COVID-19 infections after hospital discharge. *Clin. Microbiol. Infect.* 2021; **27**: 892-6. doi: 10.1016/j.cmi.2021.02.019.

17. Shah AS, Wong AW, Hague CJ, Murphy DT, Johnston JC, Ryerson CJ, et al. A prospective study of 12-week respiratory outcomes in COVID-19-related hospitalisations. *Thorax.* 2021; **76**: 402-4. doi: 10.1136/thoraxjnl-2020-216308.

18. Mo X, Jian W, Su Z, Chen M, Peng H, Peng P, et al. Abnormal pulmonary function in COVID-19 patients at time of hospital discharge. *Eur. Respir. J.* 2020; **55**: 2001217. doi: 10.1183/13993003.01217-2020.

19. Liang L, Yang B, Jiang N, Fu W, He X, Zhou Y, et al. Three-month Follow-up Study of Survivors of Coronavirus Disease 2019 after Discharge. *J. Korean. Med. Sci.* 2020; **35**: e418. doi: 10.3346/jkms.2020.35.e418.

20. Huang Y, Tan C, Wu J, Chen M, Wang Z, Luo L, et al. Impact of coronavirus disease 2019 on pulmonary function in early convalescence phase. *Respir. Res.* 2020; **21**: 163. doi: 10.1186/s12931-020-01429-6.

21. Liu K, Zhang W, Yang Y, Zhang J, Li Y, Chen Y. Respiratory rehabilitation in elderly patients with COVID-19: A randomized controlled study. *Complement. Ther. Clin. Pract.* 2020; **39**: 101166. doi: 10.1016/j.ctcp.2020.101166.

22. Zhao YM, Shang YM, Song WB, Li QQ, Xie H, Xu QF, et al. Follow-up study of the pulmonary function and related physiological characteristics of COVID-19 survivors three months after recovery. *EClinicalMedicine.* 2020; **25**: 100463. doi: 10.1016/j.eclinm.2020.100463.

23. Campbell I. Chi-squared and Fisher-Irwin tests of two-by-two tables with small sample recommendations. *Stat. Med.* 2007; **26**: 3661-75. doi: 10.1002/sim.2832.

24. Benjamini Y, Hochberg Y. Controlling the false discovery rate: a practical and powerful approach to multiple testing. *J. Royal. Stat. Soc. B* 1995; **57**: 289-300.
